# Supplementary material for: Genome Characterization and Probiotic Potential of Corynebacterium amycolatum Human Vaginal Isolates
Source: Microorganisms. 2022 Jan 23;10(2):249. doi: 10.3390/microorganisms10020249 (PMC8878833; doi:10.3390/microorganisms10020249)
Supplement: Supplementary file 1 [file microorganisms-10-00249-s001.zip]

Archive with 11 entries (11 files):
- Fig.S1.tiff
- Fig.S2.tiff
- Fig.S3.tiff
- Fig.S4.tiff
- Fig.S5.tiff
- Supplementary materials.pdf
- Table S1.pdf
- Table S2.pdf
- Table S3.xlsx
- Table S4.xlsx
- Table S5.xlsx
