# Supplementary material for: Genome Characterization and Probiotic Potential of Corynebacterium amycolatum Human Vaginal Isolates
Source: Microorganisms. 2022 Jan 23;10(2):249. doi: 10.3390/microorganisms10020249 (PMC8878833; doi:10.3390/microorganisms10020249)
Supplement: Supplementary file 1 [file microorganisms-10-00249-s001.zip › Table S1.pdf]

**Supplementary Table S1.** Comparison of genome characteristics of ICIS5, ICIS 9 and ICIS 53 with that of other *Corynebacterium amycolatum* strains

| Strain   | Isolation site | WGS Project | Sequence | Genome size (bp) | GC(%) | Assembly level | Genes (total) | Genes (coding) | CDSs (total) | Pseudo Genes (total) | rRNA | tRNA | CRISPRs |
|----------|----------------|-------------|----------|------------------|-------|----------------|---------------|----------------|--------------|----------------------|------|------|---------|
| ICIS 5   | vaginal swabs  | SSOR01      | 115      | 2,474,151        | 58,80 | Contig         | 2195          | 2062           | 2109         | 47                   | 30   | 53   | 1       |
| ICIS 9   | vaginal swabs  | MTPT01      | 181      | 2,587,830        | 58,60 | Contig         | 2392          | 2277           | 2330         | 53                   | 6    | 53   | -       |
| ICIS 53  | vaginal swabs  | MIFV01      | 41       | 2,460,257        | 59,00 | Contig         | 2173          | 2076           | 2110         | 34                   | 7    | 53   | -       |
| SK46*    | human skin     | ABZU01      | 48       | 2,513,912        | 58,60 | Contig         | 2198          | 2098           | 2135         | 37                   | 2    | 49   | 1       |
| NCTC7243 | human nose     | UFXE01      | 6        | 2,638,280        | 58,80 | Contig         | 2302          | 2166           | 2268         | 52                   | 28   | 53   | 2       |
| UMB0042  | female urine   | PKHS01      | 16       | 2,479,600        | 58,9  | Scaffold       | 2184          | 2093           | 2125         | 32                   | 4    | 52   | -       |
| UMB0338  | female urine   | PKHT01      | 39       | 2,465,259        | 58,9  | Scaffold       | 2183          | 2068           | 2144         | 46                   | 13   | 53   | -       |
| UMB7760  | female urine   | VYVQ01      | 65       | 2,422,276        | 58,9  | Contig         | 2141          | 2045           | 2078         | 33                   | 6    | 54   | 1       |
| UMB9184  | female urine   | VYVF01      | 61       | 2,494,409        | 58,9  | Contig         | 2206          | 2111           | 2142         | 31                   | 7    | 54   | 1       |
| UMB1182  | female urine   | VYWH01      | 41       | 2,425,544        | 58,7  | Contig         | 2149          | 2040           | 2086         | 46                   | 6    | 54   | -       |
| UMB1310  | female urine   | VYWB01      | 54       | 2,492,575        | 58,8  | Contig         | 2215          | 2096           | 2153         | 57                   | 5    | 54   | -       |
| UMB9256  | female urine   | VYVD01      | 65       | 2,565,104        | 58,8  | Contig         | 2276          | 2166           | 2208         | 42                   | 12   | 53   | 1       |

\**C. amycolatum*, strain SK46 (HMP ID 0282) is a reference genome for The Human Microbiome Project (HMP).
