# Supplementary material for: Genome Characterization and Probiotic Potential of Corynebacterium amycolatum Human Vaginal Isolates
Source: Microorganisms. 2022 Jan 23;10(2):249. doi: 10.3390/microorganisms10020249 (PMC8878833; doi:10.3390/microorganisms10020249)
Supplement: Supplementary file 1 [file microorganisms-10-00249-s001.zip › Table S2.pdf]

**Supplementary Table S2.** eggNOG categories of coding proteins in *Corynebacterium amycolatum* ICIS 5, ICIS 9 and ICIS 53 genomes.

| Class    | Name                                                          | ICIS 5 |           | ICIS 9 |           | ICIS 53 |           |
|----------|---------------------------------------------------------------|--------|-----------|--------|-----------|---------|-----------|
| <b>J</b> | Translation, ribosomal structure and biogenesis               | 141    | 6,84 (%)  | 141    | 6,19 (%)  | 136     | 6,55 (%)  |
| <b>A</b> | RNA processing and modification                               | 1      | 0,05 (%)  | 1      | 0,04 (%)  | 1       | 0,05 (%)  |
| <b>K</b> | Transcription                                                 | 99     | 4,80 (%)  | 101    | 4,44 (%)  | 97      | 4,67 (%)  |
| <b>L</b> | Replication, recombination and repair                         | 130    | 6,30 (%)  | 228    | 10,01 (%) | 100     | 4,82 (%)  |
| <b>B</b> | Chromatin structure and dynamics                              | 0      | 0,00 (%)  | 0      | 0,00 (%)  | 0       | 0,00 (%)  |
| <b>D</b> | Cell cycle control, cell division, chromosome partitioning    | 19     | 0,92 (%)  | 19     | 0,83 (%)  | 21      | 1,01 (%)  |
| <b>Y</b> | Nuclear structure                                             | 0      | 0,00 (%)  | 0      | 0,00 (%)  | 0       | 0,00 (%)  |
| <b>V</b> | Defense mechanisms                                            | 48     | 2,33 (%)  | 50     | 2,20 (%)  | 44      | 2,12 (%)  |
| <b>T</b> | Signal transduction mechanisms                                | 48     | 2,33 (%)  | 52     | 2,28 (%)  | 50      | 2,41 (%)  |
| <b>M</b> | Cell wall/membrane/envelope biogenesis                        | 83     | 4,03 (%)  | 83     | 3,65 (%)  | 83      | 4,00 (%)  |
| <b>N</b> | Cell motility                                                 | 0      | 0,00 (%)  | 0      | 0,00 (%)  | 0       | 0,00 (%)  |
| <b>Z</b> | Cytoskeleton                                                  | 1      | 0,05 (%)  | 1      | 0,04 (%)  | 1       | 0,05 (%)  |
| <b>W</b> | Extracellular structures                                      | 0      | 0,00 (%)  | 0      | 0,00 (%)  | 0       | 0,00 (%)  |
| <b>U</b> | Intracellular trafficking, secretion, and vesicular transport | 20     | 0,97 (%)  | 20     | 0,88 (%)  | 20      | 0,96 (%)  |
| <b>O</b> | Posttranslational modification, protein turnover, chaperones  | 72     | 3,49 (%)  | 74     | 3,25 (%)  | 74      | 3,56 (%)  |
| <b>X</b> | Mobilome: prophages, transposons                              | 0      | 0,00 (%)  | 0      | 0,00 (%)  | 0       | 0,00 (%)  |
| <b>C</b> | Energy production and conversion                              | 96     | 4,66 (%)  | 101    | 4,44 (%)  | 98      | 4,72 (%)  |
| <b>G</b> | Carbohydrate transport and metabolism                         | 96     | 4,66 (%)  | 95     | 4,17 (%)  | 97      | 4,67 (%)  |
| <b>E</b> | Amino acid transport and metabolism                           | 150    | 7,27 (%)  | 148    | 6,50 (%)  | 152     | 7,32 (%)  |
| <b>F</b> | Nucleotide transport and metabolism                           | 66     | 3,20 (%)  | 66     | 2,90 (%)  | 66      | 3,18 (%)  |
| <b>H</b> | Coenzyme transport and metabolism                             | 97     | 4,70 (%)  | 105    | 4,61 (%)  | 97      | 4,67 (%)  |
| <b>I</b> | Lipid transport and metabolism                                | 71     | 3,44 (%)  | 71     | 3,12 (%)  | 71      | 3,42 (%)  |
| <b>P</b> | Inorganic ion transport and metabolism                        | 144    | 6,98 (%)  | 141    | 6,19 (%)  | 138     | 6,65 (%)  |
| <b>Q</b> | Secondary metabolites biosynthesis, transport and catabolism  | 25     | 1,21 (%)  | 24     | 1,05 (%)  | 25      | 1,20 (%)  |
| <b>R</b> | General function prediction only                              | 0      | 0,00 (%)  | 0      | 0,00 (%)  | 0       | 0,00 (%)  |
| <b>S</b> | Function unknown                                              | 383    | 18,57 (%) | 390    | 17,13 (%) | 390     | 18,79 (%) |
| <b>-</b> | Not assigned                                                  | 272    | 13,19 (%) | 366    | 16,07 (%) | 315     | 15,17 (%) |
