# Supplementary material for: Genome Characterization and Probiotic Potential of Corynebacterium amycolatum Human Vaginal Isolates
Source: Microorganisms. 2022 Jan 23;10(2):249. doi: 10.3390/microorganisms10020249 (PMC8878833; doi:10.3390/microorganisms10020249)
Supplement: Supplementary file 1 [file microorganisms-10-00249-s001.zip › Table S3.xlsx]

## Sheet: Table S3
Supplementary table S3. Condensed Gene of ICIS 9
region_name	region_size	orf	gene_name	gene_start	gene_end	gene_strand	real_start	real_end	real_strand	gene_color	function	motifs
NZ_MTPT010000031.44.AOI_01	20000	orf00002	orf00002	601	4359	-	81444	85202	-	#8fbcb9	Nitrate reductase alpha subunit
NZ_MTPT010000031.44.AOI_01	20000	orf00003	orf00003	4381	5556	-	85224	86399	-	#8fbcb9	Probable nitrate/nitrite antiporter NarK2
NZ_MTPT010000031.44.AOI_01	20000	orf00007	orf00007	6080	6577	+	86923	87420	+	#8fbcb9	Molybdenum cofactor biosynthesis bifunctional protein
NZ_MTPT010000031.44.AOI_01	20000	orf00009	orf00009	6593	7276	-	87436	88119	-	#8fbcb9	Probable molybdenum cofactor guanylyltransferase
NZ_MTPT010000031.44.AOI_01	20000	orf00011	orf00011	7287	7784	-	88130	88627	-	#8fbcb9	Cyclic pyranopterin monophosphate synthase
NZ_MTPT010000031.44.AOI_01	20000	orf00013	orf00013	7819	8961	-	88662	89804	-	#8fbcb9	Molybdopterin molybdenumtransferase 2
NZ_MTPT010000031.44.AOI_01	20000	orf00016	BmbF	9058	10044	-	89901	90887	-	#6ba3ff	GTP 3',8-cyclase	PF04055
NZ_MTPT010000031.44.AOI_01	20000	orf00017	orf00017	10089	11141	-	90932	91984	-	#8fbcb9	Probable adenylyltransferase/sulfurtransferase MoeZ
NZ_MTPT010000031.44.AOI_01	20000	orf00020	orf00020	11166	11624	-	92009	92467	-	#8fbcb9	Molybdopterin synthase catalytic subunit
NZ_MTPT010000031.44.AOI_01	20000	orf00022	orf00022	11629	12033	-	92472	92876	-	#8fbcb9	Molybdenum cofactor biosynthesis protein B
NZ_MTPT010000031.44.AOI_01	20000	orf00024	orf00024	12326	12586	+	93169	93429	+	#8fbcb9	Small archaeal modifier protein 3
NZ_MTPT010000031.44.AOI_01	20000	orf00029	orf00029	12706	16263	+	93549	97106	+	#8fbcb9	DNA polymerase III subunit alpha
NZ_MTPT010000031.44.AOI_01	20000	orf00032	orf00032	16320	17615	+	97163	98458	+	#8fbcb9	L-threonine dehydratase biosynthetic IlvA
