# Supplementary material for: Genome Characterization and Probiotic Potential of Corynebacterium amycolatum Human Vaginal Isolates
Source: Microorganisms. 2022 Jan 23;10(2):249. doi: 10.3390/microorganisms10020249 (PMC8878833; doi:10.3390/microorganisms10020249)
Supplement: Supplementary file 1 [file microorganisms-10-00249-s001.zip › Table S5.xlsx]

## Sheet: Table S5
Supplementary table S5. Virulence related genes detected in Corynebacterium amycolatum ICIS 5, ICIS 9 and ICIS 53
Vfclass	Virulence factors	Related genes	ICIS 5	ICIS 9	ICIS 53
Adherence	SpaD-type pili	spaD	-	BXT90_07460	-
		spaF	E7L51_10225	-	-
		srtB	E7L51_09450	BXT90_10460	BGC22_09015
		srtC	E7L51_10215	-	BGC22_09095
Iron uptake	ABC transporter	fagA	E7L51_02640	BXT90_04985	-
		fagB	E7L51_02635	BXT90_04980	-
		fagC	E7L51_02630	BXT90_04975	-
		fagD	-	BXT90_04990	-
	ABC-type heme transporter	hmuU	E7L51_07555	BXT90_04140	BGC22_05920
	Siderophore-depenedent iron uptake system	irp6A	E7L51_04655	BXT90_04525	BGC22_01725
		irp6B	E7L51_04650	BXT90_04520	BGC22_01720
		irp6C	E7L51_04645	BXT90_04515	BGC22_01715
	Mycobactin(Mycobacterium)	mbtI	E7L51_00780	BXT90_02320	BGC22_02190
	Periplasmic binding protein-dependent ABC transport systems(Vibrio)	vctC	E7L51_09540	BXT90_10130	BGC22_04985
Regulation	Diphtheria toxin repressor DtxR	dtxR	E7L51_04980	BXT90_03070	BGC22_00560
	MprA/B(Mycobacterium)	mprB	E7L51_08455	BXT90_07075	BGC22_06315
	SenX3(Mycobacterium)	senX3	E7L51_05720	BXT90_09165	BGC22_10590
	Sigma A(Mycobacterium)	sigA/rpoV	E7L51_02185	BXT90_01210	BGC22_00515
	WhiB3(Mycobacterium)	whiB3	E7L51_06720	BXT90_00170	BGC22_04270
Amino acid and purine metabolism	Lysine synthesis(Mycobacterium)	lysA	E7L51_04605	BXT90_02030	BGC22_01675
Antiphagocytosis	Capsular polysaccharide(Vibrio)	wcaJ	E7L51_07090	BXT90_03420	BGC22_06890
Cell surface components	GPL locus(Mycobacterium)	rmlA	E7L51_05845	BXT90_05740	BGC22_09775
Immune evasion	Capsule(Streptococcus)	rmlB	E7L51_05835	BXT90_05750	BGC22_09785
Lipid and fatty acid metabolism	Isocitrate lyase(Mycobacterium)	icl	E7L51_09125	BXT90_10630	BGC22_09445
	Pantothenate synthesis(Mycobacterium)	panC	E7L51_08055	BXT90_06095	BGC22_08715
		panD	E7L51_08050	BXT90_06090	BGC22_08710
Protease	Proteasome-associated proteins(Mycobacterium)	mpa	E7L51_01390	BXT90_02555	BGC22_05410
		pafA	E7L51_01375	BXT90_02540	BGC22_05395
Secretion system	Accessory secretion factor(Mycobacterium)	secA2	E7L51_01165	BXT90_05230	BGC22_05180
